# Supplementary material
Source: publisher figshare collection journal article supplement (https://tandf.figshare.com/ndownloader/files/15577262)
Supplement: Supplementary file 1 [file 15577262]

**Supplementary table (1):** Baseline data of patients who did not achieve SVR12 on SOF+DCV+RBV (discontinued, non-responder and relapsers), n=95

|  | **Relapsers**  **(n=9)** | **Discontinued**  **(n=40)** | **Non- responder**  **(n=46)** |
| --- | --- | --- | --- |
| **Age mean ±SD** | 50.89± 8.80 | 53.75 ± 8.29 | 52.63 ± 8.85 |
| **Male** | 7(77.78) | 24 (60.00) | 28 (60.87) |
| **BMI** | 26.64 ± 2.59 | 28.98 ± 5.52 | 30.27 ± 5.44 |
| **Diabetes (Yes), n(%)** | 0 | 9 (22.50) | 7 (15.22) |
| **Hypertension (Yes), n(%)** | 0 | 3 (11.54) | 4 (16.00) |
| **HCV-RNA log10** | 5.17 ± 1.39 | 5.34 ± 1.15 | 5.75 ± 0.85 |
| **ALT** | 56.10 ± 29.84 | 61.97 ±39.25 | 63.49 ±42.42 |
| **AST** | 78.27 ± 52.82 | 70.09 ± 48.09 | 81.17 ± 72.56 |
| **Albumin** | 3.43 ± 0.54 | 3.63 ± 00.65 | 3.79 ± 0.62 |
| **Total bilirubin** | 1.48± 0.62 | 1.21 ± 0.63 | 1.20 ± 0.58 |
| **WBC** | 6.00 ± 2.92 | 5.29 ± 2.17 | 5.58 ± 2.53 |
| **Hemoglobin** | 12.47 ± 1.71 | 12.99 ± 1.59 | 13.43 ± 1.58 |
| **Platelets** | 99.33 ± 33.22 | 133.7 ± 65.96 | 138 ± 57.79 |
| **INR** | 1.21 ± 0.17 | 1.21 ± 0.18 | 1.2 ± 0.22 |
| **Cirrhosis by US** | 3 (33.33) | 21 (52.50) | 28 (60.87) |
| **FIB4 Median (IQR)** | 5.14 ± 2.06 | 4.80 ± 4.70 | 3.92 ± 3.20 |
| **Past treatment**   - **SOF+RBV** - **SOF+RBV+IFN** | 7 (77.78)  2(22.22) | 32(80.00)  8 (20) | 31(67.39)  15 (32.61) |

*Data are expressed as mean ±SD or number and (%)
